# Supplementary material for: Conversion of Human Fibroblasts into Induced Neural Stem Cells by Small Molecules
Source: MDPI journal article supplement (doi:10.3390/ijms23031740), 2022-02-03
Supplement: s1 [file s1]

Table S1. Components of all culture medium used in this study.

| Culture medium                                            | Components                                                                                                                                                                                                                                               |
|-----------------------------------------------------------|----------------------------------------------------------------------------------------------------------------------------------------------------------------------------------------------------------------------------------------------------------|
| HSF medium                                                | DMEM supplemented with 10% fetal bovine serum and 1 x Pen/Strep                                                                                                                                                                                          |
| Neural stem cell medium (NSCM)                            | DMEM/F12 supplemented with 1 x Pen/Strep, 1 x B27, 20ng/ml bFGF and 20ng/ml EGF.                                                                                                                                                                         |
| Induction medium 1 (IM1)                                  | DMEM supplemented with 10% FBS, 1x Pen/Strep, 1x GlutaMAX, 1x MEM-NEAA, 10 $\mu$ M RG108, 1 $\mu$ M Bix01294, 3 $\mu$ M CHIR99021, 1 $\mu$ M Repsox, 0.2mM Ascorbic acid, 0.5 $\mu$ M LDN193189, 10 $\mu$ M Y-27632, 20ng/ml bFGF and 5 $\mu$ M Q-VD-OPh |
| Induction medium 2 (IM2)                                  | DMEM supplemented with 10% FBS, 1x Pen/Strep, 1x GlutaMAX, 1x MEM-NEAA, 10 $\mu$ M Y-27632, 20ng/ml bFGF and 20ng/ml EGF (5 $\mu$ M Q-VD-OPh was added to IM2 when replating the cells)                                                                  |
| Spontaneous differentiation medium (SDM)                  | DMEM/F12 supplemented with 1 x Pen/Strep, 1 x B27                                                                                                                                                                                                        |
| Neuron differentiation medium-conditioned medium (NDM-CM) | Neurobasal Medium supplemented with 1 x Pen/Strep, 1 x B27, 1x GlutaMAX, and 20ng/ml BDNF. The medium was added to mNSCs for 24-48 hours, medium was then collected and centrifuged to remove cell debris.                                               |
| Neuron differentiation medium-Brainphy (NDM-B)            | BrainPhys™ Neuronal Medium supplemented with 1 x SM1 Neuronal Supplement, 1 x N2 Supplement-A, 100 $\mu$ M cAMP-Na, 20ng/ml BDNF, 0.2mM Ascorbic acid and 10 $\mu$ M Q-VD-OPh                                                                            |
| Neuron differentiation medium (NDM)                       | NDM-CM: NDM-B= 1: 1                                                                                                                                                                                                                                      |
| Astrocyte differentiation medium (ADM)                    | DMEM supplemented with 3% fetal bovine serum, 1 x Pen/Strep, 1x GlutaMAX, 1 x N2 and 10 $\mu$ M Q-VD-OPh                                                                                                                                                 |
| Oligodendrocyte differentiation medium (ODM)              | Neurobasal Medium supplemented with 1 x Pen/Strep, 1 x B27, 1x GlutaMAX, 30 ng/mL T3 and 10 $\mu$ M Q-VD-OPh                                                                                                                                             |

Table S2. Basic medium and reagents used in this study.

| Basic medium or reagent    | Company               | Cat #    |
|----------------------------|-----------------------|----------|
| DMEM                       | Life Technologies     | 11965084 |
| DMEM/F12                   | Life Technologies     | 11320033 |
| Neurobasal                 | Life Technologies     | 2110304  |
| BrainPhys™ Neuronal Medium | StemCell Technologies | 05793    |
| SM1 Neuronal Supplement    | StemCell Technologies | 05711    |
| N2 Supplement-A            | StemCell Technologies | 07152    |
| penicillin/streptomycin    | Life Technologies     | 15140122 |

|                          |                   |          |
|--------------------------|-------------------|----------|
| Fetal Bovine Serum (FBS) | Life Technologies | 10100139 |
| B27                      | Life Technologies | 17504044 |
| N2                       | Life Technologies | A1370701 |
| GlutaMAX                 | Life Technologies | 35050061 |
| MEM NEAA                 | Life Technologies | 11140050 |
| Bix01294                 | Reagents Direct   | 74-O89   |
| RG108                    | Reagents Direct   | 41-L99   |
| CHIR99021                | Sigma             | SML 1046 |
| Ascorbic acid            | Sigma             | A5960    |
| Repsox                   | Sigma             | R0158    |
| LDN193189                | cayman chemicals  | 11802    |
| Y27632                   | Sigma             | Y0503    |
| Q-VD-OPh                 | MedChemExpress    | HY-12305 |
| cAMP-Na                  | Sigma             | A6885    |
| EGF                      | R&D Systems       | 236-EG   |
| bFGF                     | R&D Systems       | 233-FB   |
| Geltrex                  | Life Technologies | A1413202 |
| Laminin                  | Life Technologies | 23017015 |
| BDNF                     | Made in our lab   |          |

Table S3. Detection antibodies.

| Antibodies         | Company         | Cat #     | Dilution<br>(Immunocytochemistry) | Dilution<br>(Western<br>Blot) |
|--------------------|-----------------|-----------|-----------------------------------|-------------------------------|
| Mouse anti SOX2    | Biolegend       | 656102    | 1:100                             | 1:500                         |
| Mouse anti Nestin  | Millipore       | MAB5326   | 1:100                             | 1:400                         |
| Rabbit anti Pax6   | Abcam           | ab195045  | 1:100                             |                               |
| Goat anti Ncam1    | R&D Systems     | AF2408-SP | 1:25                              | 1:250                         |
| Chicken anti-Tuj1  | Merck Millipore | AB9354    | 1:1000                            |                               |
| Rabbit anti-MAP2   | Osenses         | OSC212-1  | 1:1000                            |                               |
| Rabbit anti-NeuN   | Abcam           | ab177487  | 1:300                             |                               |
| Rabbit anti-GFAP   | Dako            | Z0334     | 1:200                             |                               |
| Mouse anti-O4      | Sigma           | MAB345    | 1:25                              |                               |
| Rabbit anti Olig2  | Millipore       | ab9610    | 1:500                             |                               |
| Mouse anti-B-actin | Abcam           | ab8227    |                                   | 1:10000                       |

|                         |                        |             |        |         |
|-------------------------|------------------------|-------------|--------|---------|
| Donkey anti-chicken CY2 | Jackson Immunoresearch | JI703225155 | 1:1000 |         |
| Donkey anti-rabbit CY3  | Jackson Immunoresearch | JI711165152 | 1:1000 |         |
| Donkey anti-rabbit CY2  | Jackson Immunoresearch | JI711225152 | 1:1000 |         |
| Donkey anti-sheep CY2   | Jackson Immunoresearch | JI713225147 | 1:1000 |         |
| Donkey anti-mouse CY3   | Jackson Immunoresearch | JI715165150 | 1:1000 |         |
| Donkey anti-mouse CY2   | Jackson Immunoresearch | JI715225150 | 1:1000 |         |
| Goat anti-mouse IgG     | Li-Cor Biosciences     |             |        | 1:20000 |

Table S4. Primers and probes.

| Gene    | Forward                 | Reverse                | Probe                 |
|---------|-------------------------|------------------------|-----------------------|
| Sox2    | TACAGCATGATGCAGGACCA    | GTACTGCAGGGCGCTCAC     | CAGATGCAGCCCATGCAC    |
| PAX6    | GAGACTGGCTCCATCAGACC    | TTTCCCAAGCAAAGATGGAC   | AACCGAGAGTAGCGACTCCA  |
| Nestin  | GTCCATCCTCAGTGGGTCAG    | AGCAGCTCATTCTGCTCCTC   | GGGAGGAGTCGTTTCA GATG |
| Olig2   | AGCTGCGACGACTATCTTCC    | CGTGCTGCCCTTACTCC      | GAGCCCGATGACCTTT TTCT |
| L1cam   | CGTGTCACCTACCAGAACCA    | TCCACGGTGACATAGTACGC   | GAGGAGGATGATGGCG AGTA |
| MAPT    | GTCCGTA CTCCACCCAAGTC   | ATTCTTCAGGTCTGGCATGG   | AGAGCCGCCTGCAGACAG    |
| Map2    | CCAATGGATTCCCATACAGG    | TCTCCGTTGATCCCATTCTC   | AGGATGAAGAGGGTGCTTT   |
| CNTN1   | GATGAAACCATGAGCCCTTC    | GGCTGTAAGGTCCATCTCCTT  | AAGTCAAGGCCTTCAACAACA |
| NeuN    | CACCCACGCAGGACTAC       | TGCTGGTGTGTACAGGGTCA   | GGTCCCCACAGAGCATGG    |
| Col1a1  | TACCATGACCGAGACGTGTG    | AGATCACGTCATCGCACAC    | GATCTGCGTCTGCGAC AAC  |
| GAPDH   | ACCCAGAAGACTGTGGATGG    | GAGGCAGGGATGATGTTCTG   | GGGAAACTGTGGCGTGAT    |
| NeuroD1 | GGTGCCTTGCTATTCTAAGACGC | GCAAAGCGTCTGAACGAAGGAG |                       |
| GFAP    | CCTGCAGATTCGAGAAAC CAG  | TCCTGCCTCACATCACATCC   |                       |
| Tuj1    | AGATCGGGGCCAAGTTCTTG    | TCGAGGCACGTACTTGTGAG   |                       |
| S100A4  | CTCTCCTCAGCGCTTCTTCTT   | ACAGCAGTCAGGATCAACAC   |                       |
| GAPDH   | GTCTCCTCTGACTTCAACAGCG  | ACCACCCTGTTGCTGTAGCCAA |                       |

## **Supplemental Experimental Procedures**

Generation of hiNSCs-1 from human fibroblasts

Day 0: Initial fibroblasts were seeded onto T-25 flasks ( $1.2-1.5 \times 10^6$  cells/flask) and cultured with IM1.

Day 3: Culture medium was changed with new prepared IM1.

Day 6: T-25 flasks were coated with 0.5-1% Geltrex (Gibco) for at least 2 hours. Cells were then transferred onto the T-25 flask and cultured with IM2 (with 5  $\mu$ M Q-VD-OPh).

Medium change and cell transfer after Day 6 are shown as following:

Day 9: IM2. Day 12: IM1. Day 15: IM1. Day 18: IM2. Day 21: IM1. Day 25: IM1. Day 27: IM2.

Day 30: Cells were transferred onto T-25 flasks pre-coated with Geltrex (Gibco) and cultured IM2 (with 5  $\mu$ M Q-VD-OPh).

Day 33: IM2. Day 37: IM2. Day 41: Cells were transferred onto T-25 flasks pre-coated with Geltrex (Gibco) and cultured IM2.

Day 42: Cells were then cultured in NSCM for expansion.
